# Supplementary material for: Competition between weak hydrogen bonds: C–H⋯Cl is preferred to C–H⋯F in CH2ClF–H2CO, as revealed by rotational spectroscopy
Source: Royal Society of Chemistry journal article supplement (doi:10.1039/c4cp00919c), 2014-01-01
Supplement: c4cp00919c1.pdf [file c4cp00919c1.pdf]

## Supplementary materials

### Competition between weak hydrogen bonds: C-H $\cdots$ Cl is preferred to C-H $\cdots$ F in CH<sub>2</sub>ClF-H<sub>2</sub>CO, as revealed by rotational spectroscopy

#### Content:

- 1) Table with MP2 optimized geometries
- 2) Table of observed transitions

Table S1. MP2/6-311++G(d,p) principal axes coordinates (Å) of CFM-formaldehyde.

| Atom | Conform I |         |         | Conform II |         |         | Conform III |         |         |
|------|-----------|---------|---------|------------|---------|---------|-------------|---------|---------|
|      | X         | Y       | Z       | X          | Y       | Z       | X           | Y       | Z       |
| C    | -0.8714   | -0.7070 | -0.5924 | -0.8617    | -0.6493 | 0.0     | -0.4823     | 0.2487  | 0.0007  |
| Cl   | -1.3692   | 0.8440  | 0.0919  | -0.6720    | 1.1105  | 0.0     | -2.2472     | 0.2010  | 0.0005  |
| F    | -0.3462   | -1.5025 | 0.3946  | -2.1930    | -0.9725 | 0.0     | 0.0172      | -1.0308 | -0.0019 |
| H    | -1.7512   | -1.2019 | -0.9982 | -0.4017    | -1.0450 | -0.9007 | -0.1429     | 0.7493  | 0.9030  |
| H    | -0.0970   | -0.5210 | -1.3304 | -0.4017    | -1.0450 | 0.9007  | -0.1427     | 0.7530  | -0.8994 |
| O    | 2.1311    | 0.2130  | -0.6332 | 2.2669     | -0.8884 | 0.0     | 2.5150      | 0.7981  | -0.0021 |
| C    | 2.3192    | 0.4038  | 0.5518  | 2.8198     | 0.1935  | 0.0     | 3.1062      | -0.2637 | 0.0025  |
| H    | 3.3365    | 0.5292  | 0.9628  | 2.2458     | 1.1365  | 0.0     | 2.5665      | -1.2250 | 0.0040  |
| H    | 1.4847    | 0.4596  | 1.2699  | 3.9204     | 0.2806  | 0.0     | 4.2094      | -0.3109 | 0.0056  |

**Table S2:** Transitions frequencies ( $\nu$ , MHz) and discrepancies between experimental and calculated values ( $\Delta\nu$ , kHz) of all the observed isotopomers

| $J'_{Ka'Kc'}$   | $F'$ | $J''_{Ka''Kc''}$ | $F''$ | $^{35}\text{Cl} (0^-)$ |                        | $^{35}\text{Cl} (0^+)$ |                        | $^{37}\text{Cl} (0^-)$ |                        | $^{37}\text{Cl} (0^+)$ |                        |
|-----------------|------|------------------|-------|------------------------|------------------------|------------------------|------------------------|------------------------|------------------------|------------------------|------------------------|
|                 |      |                  |       | $\nu/\text{MHz}$       | $\Delta\nu/\text{kHz}$ | $\nu/\text{MHz}$       | $\Delta\nu/\text{kHz}$ | $\nu/\text{MHz}$       | $\Delta\nu/\text{kHz}$ | $\nu/\text{MHz}$       | $\Delta\nu/\text{kHz}$ |
| 3 <sub>13</sub> | 3    | 2 <sub>12</sub>  | 2     | 8107.6739              | -1                     | 8108.7865              | 0                      | 8052.7914              | -1                     |                        | 0                      |
| 3 <sub>13</sub> | 5    | 2 <sub>12</sub>  | 4     | 8109.1265              | 4                      | 8110.2362              | 0                      | 8053.9360              | -6                     | 8055.0377              | -2                     |
| 3 <sub>13</sub> | 4    | 2 <sub>12</sub>  | 3     | 8110.7724              | 0                      | 8111.8867              | 2                      | 8055.2307              | 0                      | 8056.3296              | -2                     |
| 3 <sub>13</sub> | 2    | 2 <sub>12</sub>  | 1     | 8106.0208              | -1                     | 8107.1426              | 8                      | 8051.4956              | -6                     |                        |                        |
| 3 <sub>03</sub> | 3    | 2 <sub>02</sub>  | 2     | 8539.7040              | -4                     | 8541.5385              | 0                      | 8488.8632              | -1                     |                        |                        |
| 3 <sub>03</sub> | 5    | 2 <sub>02</sub>  | 4     | 8538.7793              | -1                     | 8540.6164              | 2                      | 8488.1736              | -4                     |                        |                        |
| 3 <sub>03</sub> | 4    | 2 <sub>02</sub>  | 3     | 8537.3562              | 0                      | 8539.1865              | -1                     | 8486.9917              | 0                      | 8488.7998              | 2                      |
| 3 <sub>03</sub> | 2    | 2 <sub>02</sub>  | 1     | 8541.1298              | -1                     | 8542.9601              | -4                     | 8490.0436              | -5                     |                        |                        |
| 3 <sub>03</sub> | 4    | 2 <sub>02</sub>  | 4     | 8544.1798              | 1                      |                        |                        |                        |                        |                        |                        |
| 3 <sub>03</sub> | 3    | 2 <sub>02</sub>  | 3     | 8534.8404              | -5                     |                        |                        |                        |                        |                        |                        |
| 3 <sub>12</sub> | 3    | 2 <sub>11</sub>  | 2     | 9088.6604              | 0                      | 9091.6156              | 4                      | 9050.4853              | -5                     | 9053.4314              | 2                      |
| 3 <sub>12</sub> | 5    | 2 <sub>11</sub>  | 4     | 9083.5442              | 0                      | 9086.4984              | 1                      | 9046.4584              | -3                     | 9049.4000              | 1                      |
| 3 <sub>12</sub> | 4    | 2 <sub>11</sub>  | 3     | 9085.1789              | 0                      | 9088.1320              | 2                      | 9047.7336              | -1                     | 9050.6770              | 2                      |
| 3 <sub>12</sub> | 2    | 2 <sub>11</sub>  | 1     | 9087.0206              | 3                      | 9089.9726              | 1                      | 9049.2052              | -6                     | 9052.1501              | 2                      |
| 4 <sub>14</sub> | 3    | 3 <sub>13</sub>  | 2     | 10792.2039             | -2                     | 10793.6242             | -2                     | 10717.4607             | -3                     | 10718.8616             | -1                     |
| 4 <sub>14</sub> | 4    | 3 <sub>13</sub>  | 3     | 10792.5686             | 0                      | 10793.9907             | 3                      | 10717.7318             | 0                      | 10719.1331             | 2                      |
| 4 <sub>14</sub> | 6    | 3 <sub>13</sub>  | 5     | 10793.2326             | 1                      | 10794.6538             | 1                      | 10718.2672             | -1                     | 10719.6653             | -1                     |
| 4 <sub>14</sub> | 5    | 3 <sub>13</sub>  | 4     | 10793.5860             | -1                     | 10795.0064             | 0                      | 10718.5305             | -1                     | 10719.9287             | -2                     |
| 4 <sub>04</sub> | 3    | 3 <sub>03</sub>  | 2     | 11307.5120             | -4                     | 11309.6905             | -7                     | 11234.1585             | -3                     | 11236.2913             | -4                     |
| 4 <sub>04</sub> | 4    | 3 <sub>03</sub>  | 3     | 11305.6899             | -1                     | 11307.8714             | 2                      | 11232.6438             | -4                     | 11234.7762             | -3                     |
| 4 <sub>04</sub> | 6    | 3 <sub>03</sub>  | 5     | 11306.2486             | -1                     | 11308.4308             | 0                      | 11233.1456             | -4                     | 11235.2777             | -4                     |
| 4 <sub>04</sub> | 5    | 3 <sub>03</sub>  | 4     | 11304.4150             | -1                     | 11306.5934             | -1                     | 11231.6284             | -1                     | 11233.7611             | 1                      |
| 4 <sub>04</sub> | 5    | 3 <sub>03</sub>  | 5     | 11309.8178             | 3                      |                        |                        |                        |                        |                        |                        |
| 4 <sub>04</sub> | 4    | 3 <sub>03</sub>  | 4     | 11303.1772             | -3                     |                        |                        |                        |                        |                        |                        |
| 4 <sub>13</sub> | 3    | 3 <sub>12</sub>  | 2     | 12092.6271             | -4                     | 12096.4912             | 0                      | 12040.8097             | -10                    | 12044.6486             | -7                     |
| 4 <sub>13</sub> | 4    | 3 <sub>12</sub>  | 3     | 12092.9162             | -1                     | 12096.7769             | 0                      | 12041.0199             | -1                     | 12044.8554             | -1                     |
| 4 <sub>13</sub> | 6    | 3 <sub>12</sub>  | 5     | 12090.5560             | -1                     | 12094.4193             | 2                      | 12039.1731             | -3                     | 12043.0105             | 0                      |
| 4 <sub>13</sub> | 5    | 3 <sub>12</sub>  | 4     | 12090.8358             | -2                     | 12094.6987             | 1                      | 12039.3685             | -4                     | 12043.2078             | 0                      |
| 4 <sub>13</sub> | 4    | 3 <sub>12</sub>  | 4     | 12084.1549             | 1                      |                        |                        |                        |                        |                        |                        |
| 5 <sub>15</sub> | 5    | 4 <sub>14</sub>  | 4     | 13461.8702             | 1                      | 13463.5517             | 1                      | 13366.3256             | 2                      |                        |                        |
| 5 <sub>15</sub> | 4    | 4 <sub>14</sub>  | 3     | 13461.9871             | 2                      | 13463.6670             | 0                      | 13366.4322             | -3                     |                        |                        |
| 5 <sub>15</sub> | 6    | 4 <sub>14</sub>  | 5     | 13462.3401             | 1                      | 13464.0186             | -1                     | 13366.6907             | 0                      | 13368.3358             | -5                     |
| 5 <sub>15</sub> | 7    | 4 <sub>14</sub>  | 6     | 13462.4623             | 3                      | 13464.1414             | 0                      | 13366.8027             | -3                     | 13368.4544             | -1                     |
| 5 <sub>05</sub> | 5    | 4 <sub>04</sub>  | 4     | 14011.0458             | 2                      | 14013.3865             | 1                      | 13912.0817             | 1                      |                        |                        |
| 5 <sub>05</sub> | 4    | 4 <sub>04</sub>  | 3     | 14013.1660             | -1                     | 14015.5082             | -4                     | 13913.8310             | 2                      |                        |                        |
| 5 <sub>05</sub> | 6    | 4 <sub>04</sub>  | 5     | 14010.1938             | -1                     | 14012.5369             | 1                      | 13911.4043             | 2                      | 13913.6678             | 1                      |
| 5 <sub>05</sub> | 7    | 4 <sub>04</sub>  | 6     | 14012.3323             | 0                      | 14014.6777             | 1                      | 13913.1604             | 0                      | 13915.4253             | -1                     |
| 5 <sub>14</sub> | 5    | 4 <sub>13</sub>  | 4     | 15077.7387             | 0                      | 15082.4312             | 1                      | 15010.1703             | 3                      |                        |                        |
| 5 <sub>14</sub> | 4    | 4 <sub>13</sub>  | 3     | 15078.0279             | 5                      | 15082.7194             | 4                      | 15010.4300             | 4                      |                        |                        |
| 5 <sub>14</sub> | 6    | 4 <sub>13</sub>  | 5     | 15076.3539             | 3                      | 15081.0442             | 3                      | 15009.0694             | 4                      | 15013.7230             | 6                      |

|                 |   |                 |   |            |     |            |    |            |    |            |    |
|-----------------|---|-----------------|---|------------|-----|------------|----|------------|----|------------|----|
| 5 <sub>14</sub> | 7 | 4 <sub>13</sub> | 6 | 15076.6359 | -2  | 15081.3308 | 0  | 15009.3261 | 0  | 15013.9784 | 0  |
| 6 <sub>16</sub> | 6 | 5 <sub>15</sub> | 5 | 16114.5297 | 6   | 16116.4166 | -1 |            |    |            |    |
| 6 <sub>16</sub> | 7 | 5 <sub>15</sub> | 6 | 16114.7832 | 1   |            |    |            |    |            |    |
| 6 <sub>16</sub> | 8 | 5 <sub>15</sub> | 7 | 16115.1382 | 8   | 16117.0271 | 1  | 15997.8796 | 9  | 15999.7284 | 7  |
| 6 <sub>16</sub> | 5 | 5 <sub>15</sub> | 4 | 16114.8570 | -12 |            |    |            |    |            |    |
| 6 <sub>06</sub> | 6 | 5 <sub>05</sub> | 5 | 16652.3433 | 1   |            |    |            |    |            |    |
| 6 <sub>06</sub> | 7 | 5 <sub>05</sub> | 6 | 16651.7236 | 2   | 16654.0655 | 1  |            |    |            |    |
| 6 <sub>06</sub> | 8 | 5 <sub>05</sub> | 7 | 16654.0112 | 3   | 16656.3507 | -2 | 16526.2601 | 6  | 16528.4990 | 5  |
| 6 <sub>06</sub> | 5 | 5 <sub>05</sub> | 4 | 16654.5823 | 0   | 16656.9238 | -3 |            |    |            |    |
| 6 <sub>15</sub> | 6 | 5 <sub>14</sub> | 5 | 18034.9530 | 3   | 18040.3661 | -3 |            |    |            |    |
| 6 <sub>15</sub> | 7 | 5 <sub>14</sub> | 6 | 18033.9397 | 0   | 18039.3516 | -7 |            |    |            |    |
| 6 <sub>15</sub> | 8 | 5 <sub>14</sub> | 7 | 18034.5950 | 4   | 18040.0101 | -1 | 17948.9840 | 2  |            |    |
| 6 <sub>15</sub> | 5 | 5 <sub>14</sub> | 4 | 18035.5983 | 0   |            |    |            |    |            |    |
| 3 <sub>22</sub> | 5 | 2 <sub>21</sub> | 4 | 8605.4568  | 1   | 8607.5257  | -1 |            |    |            |    |
| 3 <sub>22</sub> | 3 | 2 <sub>21</sub> | 2 | 8607.6770  | -2  | 8609.7527  | 4  |            |    |            |    |
| 3 <sub>22</sub> | 4 | 2 <sub>21</sub> | 3 | 8613.2374  | -2  | 8615.3083  | 3  |            |    |            |    |
| 3 <sub>21</sub> | 5 | 2 <sub>20</sub> | 4 | 8674.3832  | 3   | 8676.6919  | 4  |            |    |            |    |
| 3 <sub>21</sub> | 3 | 2 <sub>20</sub> | 2 | 8677.5967  | 3   | 8679.9039  | 2  |            |    |            |    |
| 3 <sub>21</sub> | 4 | 2 <sub>20</sub> | 3 | 8683.5848  | -2  | 8685.8925  | 0  |            |    |            |    |
| 4 <sub>23</sub> | 6 | 3 <sub>22</sub> | 5 | 11462.1066 | 0   |            |    |            |    |            |    |
| 4 <sub>23</sub> | 4 | 3 <sub>22</sub> | 3 | 11463.9822 | -2  | 11466.7035 | 7  |            |    |            |    |
| 4 <sub>23</sub> | 5 | 3 <sub>22</sub> | 4 | 11464.9860 | 0   | 11467.6956 | -2 |            |    |            |    |
| 4 <sub>22</sub> | 6 | 3 <sub>21</sub> | 5 | 11632.8306 | -5  | 11636.1242 | -3 |            |    |            |    |
| 4 <sub>22</sub> | 4 | 3 <sub>21</sub> | 3 | 11636.1684 | -5  | 11639.4603 | -6 |            |    |            |    |
| 4 <sub>22</sub> | 5 | 3 <sub>21</sub> | 4 | 11637.5465 | -4  | 11640.8396 | -4 |            |    |            |    |
| 6 <sub>25</sub> | 8 | 5 <sub>24</sub> | 7 | 17132.7616 | -9  |            |    |            |    |            |    |
| 6 <sub>25</sub> | 5 | 5 <sub>24</sub> | 4 | 17135.8662 | 1   |            |    |            |    |            |    |
| 6 <sub>25</sub> | 7 | 5 <sub>24</sub> | 6 | 17135.9365 | 3   |            |    |            |    |            |    |
| 6 <sub>24</sub> | 6 | 5 <sub>23</sub> | 5 | 17698.6201 | 3   |            |    |            |    |            |    |
| 6 <sub>24</sub> | 8 | 5 <sub>23</sub> | 7 | 17696.0810 | -1  |            |    |            |    |            |    |
| 6 <sub>24</sub> | 5 | 5 <sub>23</sub> | 4 | 17695.9199 | 2   |            |    |            |    |            |    |
| 6 <sub>24</sub> | 7 | 5 <sub>23</sub> | 6 | 17698.7764 | 0   |            |    |            |    |            |    |
| 1 <sub>11</sub> | 2 | 0 <sub>00</sub> | 2 | 7240.9448  | 0   | 7242.8924  | -2 | 7067.7755  | -2 |            | -1 |
| 1 <sub>11</sub> | 3 | 0 <sub>00</sub> | 2 | 7258.0559  | 0   | 7260.0064  | 0  | 7081.2857  | 0  |            | 1  |
| 1 <sub>11</sub> | 1 | 0 <sub>00</sub> | 2 | 7271.7614  | 0   | 7273.7129  | 0  |            |    |            |    |
| 2 <sub>12</sub> | 3 | 1 <sub>01</sub> | 2 | 9785.6341  | 4   |            |    |            |    |            |    |
| 2 <sub>12</sub> | 2 | 1 <sub>01</sub> | 2 | 9792.3050  | -8  |            |    |            |    |            |    |
| 2 <sub>12</sub> | 3 | 1 <sub>01</sub> | 3 | 9793.4146  | -1  |            |    |            |    |            |    |
| 2 <sub>12</sub> | 4 | 1 <sub>01</sub> | 3 | 9802.7276  | 0   | 9804.7569  | 2  |            |    |            |    |
| 2 <sub>12</sub> | 2 | 1 <sub>01</sub> | 1 | 9806.3221  | -1  |            |    |            |    |            |    |
| 2 <sub>12</sub> | 1 | 1 <sub>01</sub> | 1 | 9815.6685  | -1  |            |    |            |    |            |    |
| 3 <sub>13</sub> | 4 | 2 <sub>02</sub> | 3 | 12176.4089 | -5  |            |    |            |    |            |    |
| 3 <sub>13</sub> | 3 | 2 <sub>02</sub> | 3 | 12180.0063 | 7   |            |    |            |    |            |    |
| 3 <sub>13</sub> | 5 | 2 <sub>02</sub> | 4 | 12190.8982 | 0   | 12192.7179 | 0  |            |    |            |    |

---

|                 |   |                 |   |            |    |            |    |
|-----------------|---|-----------------|---|------------|----|------------|----|
| 4 <sub>04</sub> | 6 | 3 <sub>13</sub> | 5 | 7654.1296  | -1 | 7656.3294  | 2  |
| 5 <sub>05</sub> | 7 | 4 <sub>14</sub> | 6 | 10873.2327 | 1  | 10876.3469 | -4 |
| 5 <sub>05</sub> | 5 | 4 <sub>14</sub> | 4 | 10879.0126 | 0  |            |    |
| 5 <sub>05</sub> | 6 | 4 <sub>14</sub> | 5 | 10881.9636 | -2 |            |    |

---
